# Supplementary material for: A Population-Based Analysis of Diabetes-Related Care Measures, Foot Complications, and Amputation During the COVID-19 Pandemic in Ontario, Canada
Source: PubMed Central journal article supplement (PMC8733837; doi:10.1001/jamanetworkopen.2021.42354), 2022-01-05
Supplement: jamanetwopen-e2142354-s001.pdf [file jamanetwopen-e2142354-s001.pdf]

## Supplemental Online Content

de Mestral C, Gomez D, Wilton AS, et al. A population-based analysis of diabetes-related care measures, foot complications, and amputation during the COVID-19 pandemic in Ontario, Canada. *JAMA Netw Open*. 2022;5(1):e2142354. doi:10.1001/jamanetworkopen.2021.42354

**eAppendix 1.** Database, Coding Definitions, and Supporting References

**eAppendix 2.** Count of Adults with Diabetes and Total Person-Weeks per Time Period

This supplemental material has been provided by the authors to give readers additional information about their work.

## **eAppendix 1. Database, Coding Definitions, and Supporting References**

| <b>Population-based Databases</b>                      | <b>Description</b>                                                                                                   |
|--------------------------------------------------------|----------------------------------------------------------------------------------------------------------------------|
| Registered Persons Database (RPDB)                     | Records of demographics and vital statistics for all Ontario Residents <sup>1</sup>                                  |
| Discharge Abstract Database (DAD)                      | Records of all hospitalizations in Ontario acute care hospitals <sup>1</sup>                                         |
| Same Day Surgery (SDS)                                 | Records of all same day surgeries and invasive procedures in Ontario <sup>1</sup>                                    |
| Ontario Health Insurance Plan Claims Database (OHIP)   | Records of all physician service claims in Ontario <sup>1</sup>                                                      |
| National Ambulatory Care Reporting System (NACRS)      | Records of all emergency department visits in Ontario <sup>1</sup>                                                   |
| Continuing Care Reporting System Database              | Records of all admissions to publicly-funded long-term care (a.k.a. nursing home) facilities in Ontario <sup>1</sup> |
| Ontario Diabetes Database                              | Disease-specific ICES-derived cohort <sup>1,2</sup>                                                                  |
| Ontario Hypertension Database                          | Disease-specific ICES-derived cohort <sup>1,3</sup>                                                                  |
| Ontario Congestive Heart Failure Database              | Disease-specific ICES-derived cohort <sup>1,4</sup>                                                                  |
| Ontario Chronic Obstructive Pulmonary Disease Database | Disease-specific ICES-derived cohort <sup>1,5</sup>                                                                  |

**eAppendix 1. Database, Coding Definitions, and Supporting References (continued)**

| <b>Diagnosis, Measure or Intervention</b>                                                  | <b>Database</b>                | <b>Codes</b>                                                                                                                                                                                                                                                                                                             | <b>Supporting References</b> |
|--------------------------------------------------------------------------------------------|--------------------------------|--------------------------------------------------------------------------------------------------------------------------------------------------------------------------------------------------------------------------------------------------------------------------------------------------------------------------|------------------------------|
| Diabetes Mellitus (Type 1 or 2)                                                            | Ontario Diabetes Database      | Diagnosis date that precedes the index time period                                                                                                                                                                                                                                                                       | 2                            |
| Major Amputation                                                                           | DAD                            | <u>CCI</u> : 1VC93, 1VG93, 1VQ93                                                                                                                                                                                                                                                                                         | 6                            |
| Comprehensive Diabetes Management Assessment                                               | OHIP                           | <u>Physician Service Fee</u> :<br>Primary care: K030, Q040; Endocrinologist or general internal medicine specialist: K045, K046                                                                                                                                                                                          | 7, 8                         |
| Glycated Hemoglobin (A1c) Measurement                                                      | OHIP                           | <u>Laboratory Service Fee</u> :<br>L093                                                                                                                                                                                                                                                                                  | 9                            |
| Diabetic Foot Ulcer, Osteomyelitis or Gangrene                                             | DAD<br>NACRS                   | <u>ICD-10</u> :<br>Diabetic foot ulcer with or without gangrene:<br>E10.51, E10.70, E10.71, E11.51, E11.70, E11.71, E13.51, E13.70, E13.71, E14.51, E14.70, E14.71<br>Osteomyelitis of the foot: M86.17, M86.27, M86.37, M86.47, M86.67, M86.87, M86.97<br>Atherosclerosis of lower extremities with gangrene:<br>I70.21 | 10                           |
| Open Surgical Lower Extremity Revascularization                                            | DAD<br>SDS                     | <u>CCI</u> : 1KA57LA, 1KA76MZ, 1KE57LA, 1KE76MZ, 1KG57LA, 1KG76MI, 1KT57LA, 1KT76MZ, 1JM76MI                                                                                                                                                                                                                             | 11                           |
| Endovascular Lower Extremity Revascularization                                             | DAD<br>SDS                     | <u>CCI</u> : 1KA50GQ-BD, 1KA57GQ, 1KE35, 1KE50GQ, 1KE57GQ, 1KG35, 1KG50GQ, 1KG57GQ, 1KT50GQ, 1KT57GQ                                                                                                                                                                                                                     | 11                           |
| Minor Amputation                                                                           | DAD<br>SDS                     | <u>CCI</u> : 1WA93, 1WE93, 1WI93, 1WJ93, 1WK93, 1WL93, 1WM93, 1WN93                                                                                                                                                                                                                                                      | 6                            |
| <b>Patient Characteristics</b>                                                             |                                |                                                                                                                                                                                                                                                                                                                          |                              |
| Age & Sex                                                                                  | RPDB                           | -                                                                                                                                                                                                                                                                                                                        | -                            |
| Neighbourhood of residence Income Quintile, Rurality and Northern Region – LHINs 13 and 14 | RPDB                           | -                                                                                                                                                                                                                                                                                                                        | 12,13                        |
| Long-term Care Residence                                                                   | CCRS                           | Admitted to long-term care facility at beginning of given time period                                                                                                                                                                                                                                                    | 14                           |
| Hypertension                                                                               | Ontario Hypertension Database  | Diagnosis date that precedes the index time period                                                                                                                                                                                                                                                                       | 3                            |
| Congestive Heart Failure                                                                   | Ontario Heart Failure Database | Diagnosis date that precedes the index time period                                                                                                                                                                                                                                                                       | 4                            |
| Chronic Obstructive Pulmonary Disease                                                      | Ontario COPD Database          | Diagnosis date that precedes the index time period                                                                                                                                                                                                                                                                       | 5                            |

|                           |                       |                                                                                                                                                                                                                                      |      |
|---------------------------|-----------------------|--------------------------------------------------------------------------------------------------------------------------------------------------------------------------------------------------------------------------------------|------|
| Coronary Artery Disease   | DAD (5-year lookback) | <u>ICD-10:</u><br>I20, I21, I22, I23, I24, I25                                                                                                                                                                                       | 15   |
| Chronic Kidney Disease    | DAD (5-year lookback) | <u>ICD-10:</u><br>I12, I13, N08.3, N18, E10.2, E11.2, E13.2, E14.2                                                                                                                                                                   | 16   |
| Peripheral Artery Disease | DAD (5-year lookback) | <u>ICD-10:</u><br>I70.0, I70.2, I70.8, I70.9, I73.9, I74.0, I74.3, I74.4, I74.5, I74.8, I74.9, I79.2, E10.50, E10.51, E10.70, E10.71, E11.50, E11.51, E11.70, E11.71, E13.50, E13.51, E13.70, E13.71, E14.50, E14.51, E14.70, E14.71 | 6,11 |

**Abbreviations:** ICD-10-CA, International Statistical Classification of Diseases, Tenth Revision, Canadian Version; CCI, Canadian Classification of Health Interventions; DAD, Discharge Abstract Database; SDS, Same Day Surgery; OHIP, Ontario Health Insurance Plan; NACRS, National Ambulatory Care Reporting System; RPDB, Registered Persons Database; CCRS, Continuing Care Reporting System; LHIN – Local Health Integrated Network

## eAppendix 1 References:

1. ICES Data Dictionary. <https://www.ices.on.ca/Data-and-Privacy/ICES-data/Data-dictionary> (accessed June 7, 2021)
2. Hux JE, Ivis F, Flintoft V, Bica A. Diabetes in Ontario: determination of prevalence and incidence using a validated administrative data algorithm. *Diabetes Care*. 2002; 25:512–516
3. Tu K, Chen Z, Lipscombe LL; Canadian Hypertension Education Program Outcomes Research Taskforce. Prevalence and incidence of hypertension from 1995 to 2005: a population-based study. *CMAJ*. 2008;178(11):1429-1435.
4. Schultz SE, Rothwell DM, Chen Z, Tu K. Identifying cases of congestive heart failure from administrative data: a validation study using primary care patient records. *Chronic Dis Inj Can*. 2013;33(3):160-166.
5. Gershon AS, Wang C, Guan J, Vasilevska-Ristovska J, Cicutto L, To T. Identifying individuals with physician diagnosed COPD in health administrative databases. *COPD*. 2009;6(5):388-394.
6. Hussain MA, Al-Omran M, Salata K, Sivaswamy A, Forbes TL, Sattar N, Aljabri B, Kayssi A, Verma S, de Mestral C. Population-Based Secular Trends in Lower Extremity Amputation for Diabetes and Peripheral Artery Disease. *CMAJ* 2019;191(35): E655
7. Kiran T, Victor JC, Kopp A, Shah BR, Glazier RH. The relationship between financial incentives and quality of diabetes care in Ontario, Canada. *Diabetes Care*. 2012 May;35(5):1038-46.
8. Ontario Health Insurance Plan. Schedule of Benefits for Physician Services – Schedule of Benefits. [https://www.health.gov.on.ca/en/pro/programs/ohip/sob/physerv/sob\\_master20210314.pdf](https://www.health.gov.on.ca/en/pro/programs/ohip/sob/physerv/sob_master20210314.pdf)
9. Ontario Health Insurance Plan. Schedule of Benefits for Laboratory Services. [https://www.health.gov.on.ca/en/pro/programs/ohip/sob/lab/lab\\_mn2020.pdf](https://www.health.gov.on.ca/en/pro/programs/ohip/sob/lab/lab_mn2020.pdf)
10. Hopkins RB, Burke N, Harlock J, Jegathisawaran J, Goeree R. Economic burden of illness associated with diabetic foot ulcers in Canada. *BMC Health Serv Res*. 2015;15(1):13.
11. Jacob-Brassard J, Al-Omran M, Stukle TA, Mamdani M, Lee DS, de Mestral C. Validation of diagnosis and procedure codes for revascularization for peripheral artery disease in Ontario Administrative Databases. *Clin Invest Med* 2021; 44(2):E36-43
12. Wilkins R. Use of postal codes and addresses in the analysis of health data. *Health Rep* 1993;5:157-77.
13. Kralj B. Measuring rurality — RIO2008\_BASIC: methodology and results. Toronto: Ontario Medical Association; 2009.
14. Lane NE, Wodchis WP, Boyd CM, Stukel TA. Disability in long-term care residents explained by prevalent geriatric syndromes, not long-term care home characteristics: a cross-sectional study. *BMC Geriatr*. 2017; 17:49.
15. Tu JV, Chu A, Donovan LR, et al. The Cardiovascular Health in Ambulatory Care Research Team (CANHEART): using big data to measure and improve cardiovascular health and healthcare services. *Circ Cardiovasc Qual Outcomes*. 2015;8(2):204-212.
16. Fleet JL, Dixon SN, Shariff SZ, et al. Detecting chronic kidney disease in population-based administrative databases using an algorithm of hospital encounter and physician claim codes. *BMC Nephrol*. 2013;14:81.

**eAppendix 2. Count of Adults with Diabetes and Total Person-Weeks per Time Period**

|                                                                 | TIME PERIODS        |                      |                      |                     |                     |                      |
|-----------------------------------------------------------------|---------------------|----------------------|----------------------|---------------------|---------------------|----------------------|
|                                                                 | <u>Jan 1-Mar 10</u> | <u>Mar 11-May 19</u> | <u>May 20-Jul 28</u> | <u>Jul 29-Oct 6</u> | <u>Oct 7-Dec 15</u> | <u>Dec 16-Feb 23</u> |
|                                                                 | Pre-COVID-19        | Wave 1               | Wave 1               | Between Waves       | Wave 2              | Wave 2               |
| <b>No. of adults with diabetes</b><br>– 2020/21                 | 1,478,808           | 1,488,605            | 1,489,950            | 1,496,050           | 1,504,105           | 1,512,312            |
| <b>No. of adults with diabetes</b><br>– 2019/20 Control Periods | 1,432,934           | 1,441,029            | 1,451,135            | 1,461,236           | 1,469,824           | 1,478,513            |
| <b>Total Person-weeks</b><br>– 2020/21                          | 14,692,328          | 14,796,514           | 14,826,149           | 14,864,998          | 14,952,812          | 15,033,917           |
| <b>Total Person-weeks</b><br>– 2019/20 Control Periods          | 14,241,437          | 14,328,900           | 14,440,523           | 14,519,515          | 14,611,727          | 14,702,328           |
